# Supplementary material for: Long duration advertisement calls of nesting male plainfin midshipman fish are honest indicators of size and condition
Source: Oxford University Press journal article supplement (doi:10.1242/jeb.243889), 2022-03-25
Supplement: jeb243889supp.pdf [file jeb243889supp.pdf]

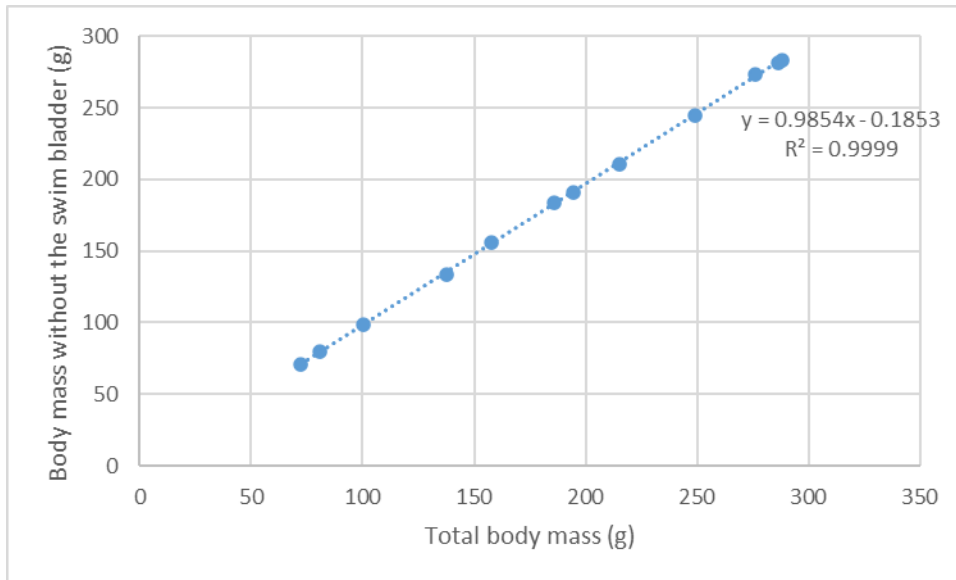

**Fig. S1.** Body mass (without the swim bladder) versus total body mass of advertisement calling type I males.

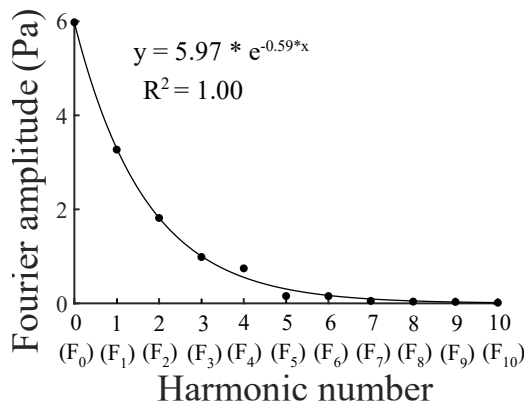

**Fig. S2.** Fourier amplitude plotted as a function of harmonic number for a single representative 1 minute call segment. For this specific advertisement call, an exponential decay function of the form  $y = a * e^{-bx}$  fit the data almost perfectly,  $R^2 \approx 1$ , where  $a = 5.97$  and  $b = 0.59$ .  $b$  represents the harmonic decay rate.

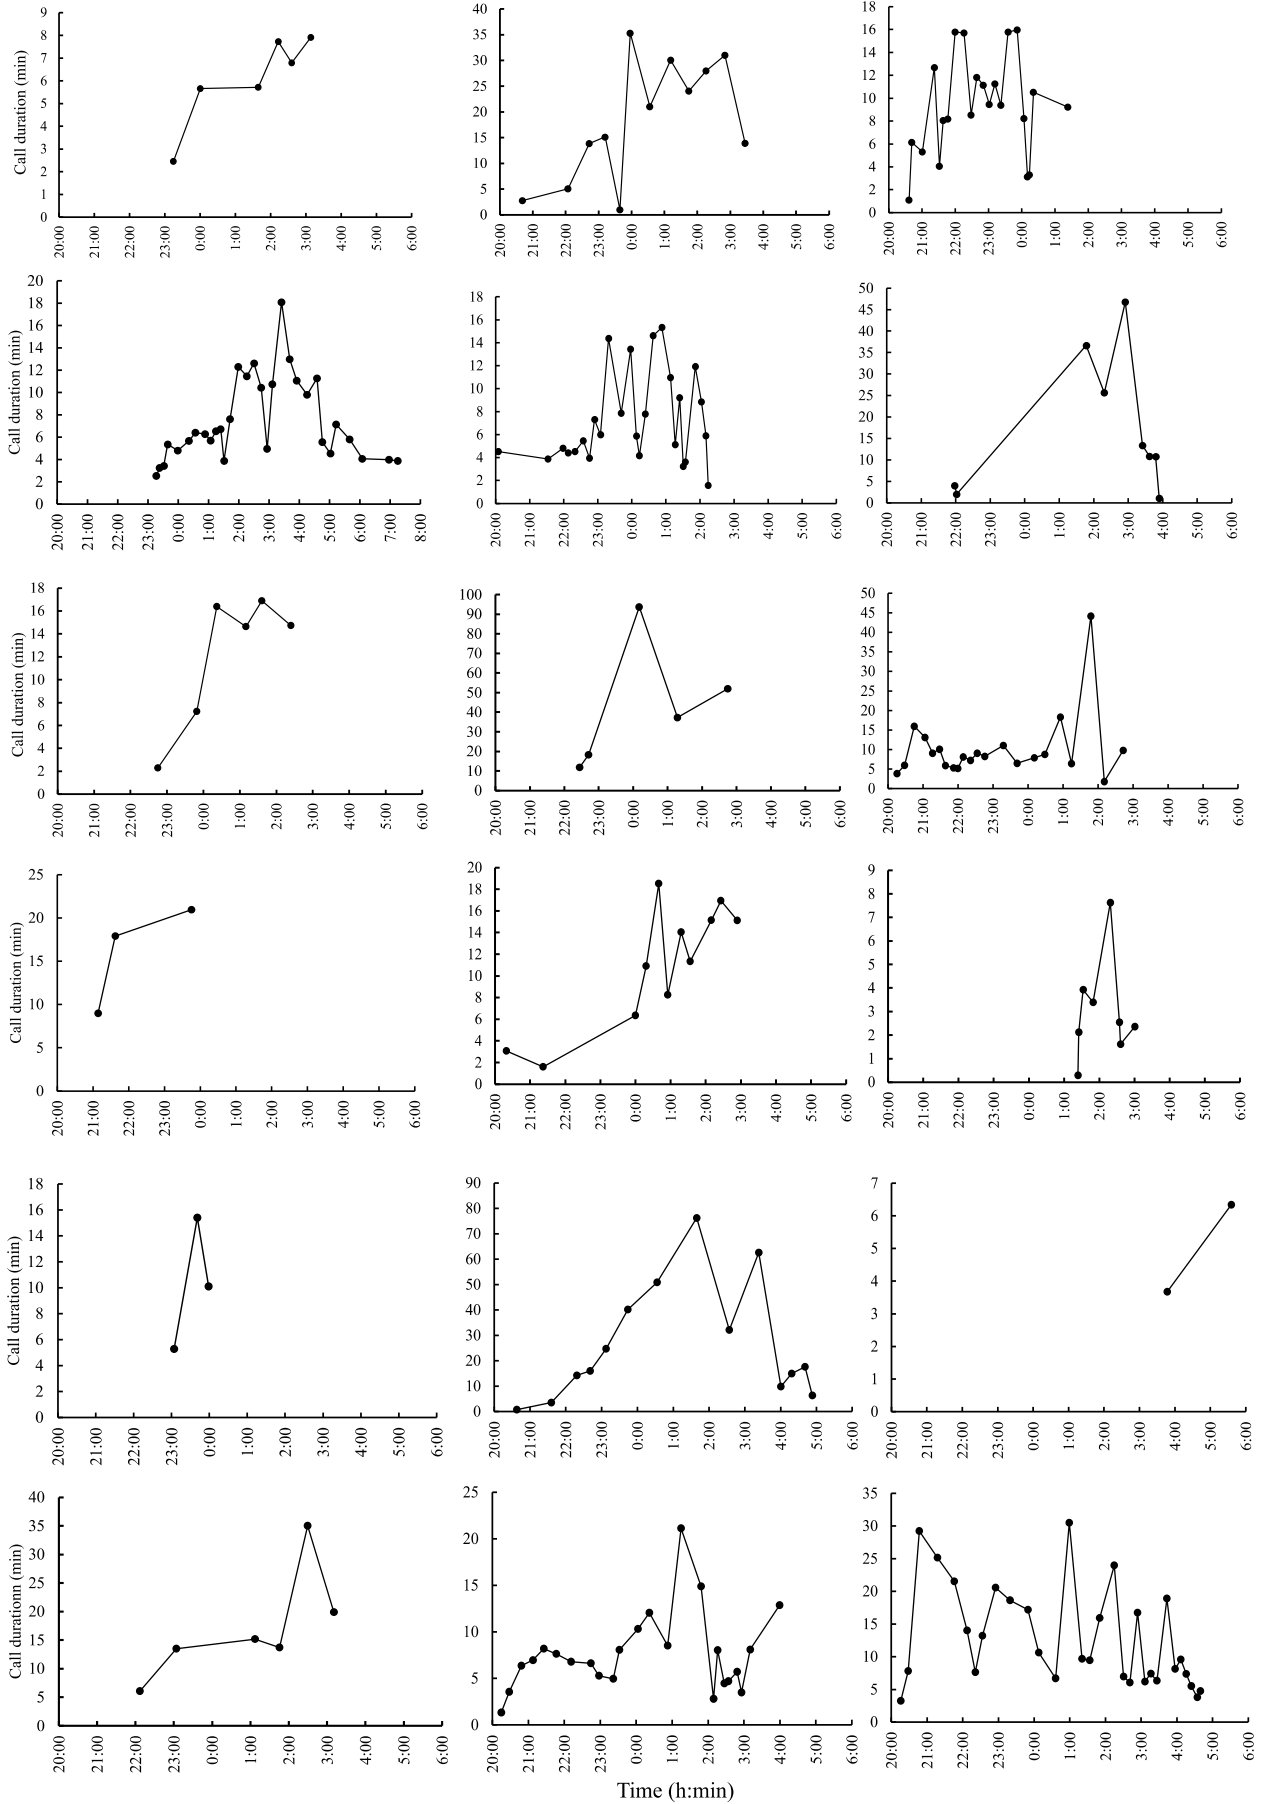

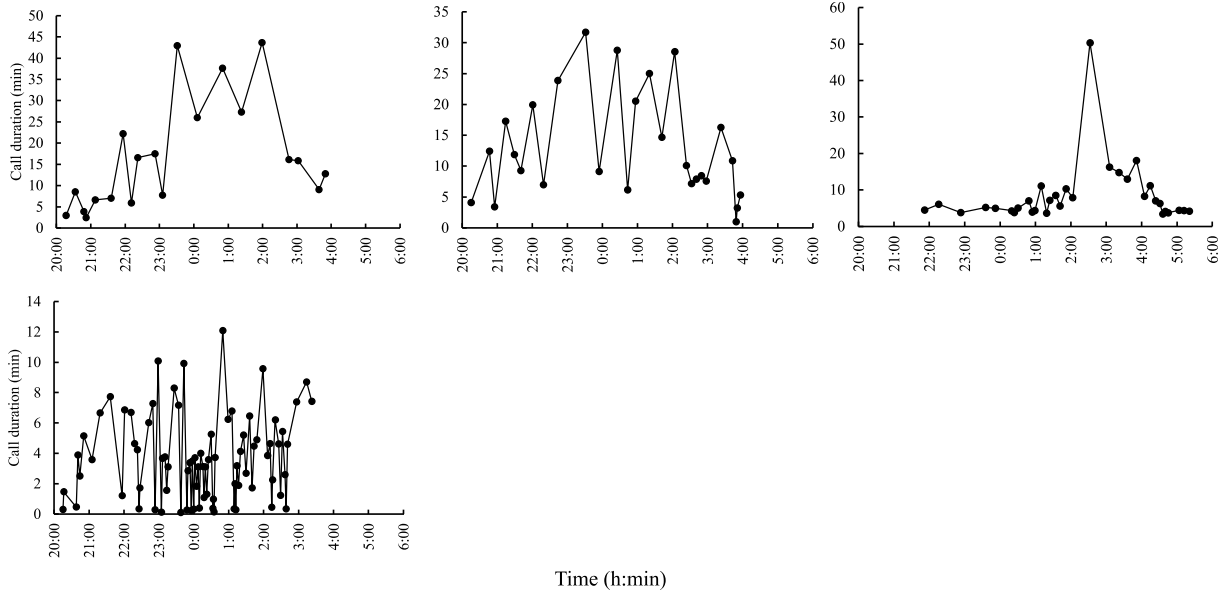

**Fig. S3.** Call duration versus time for all 22 individuals.
